# Supplementary material for: New Zn2+ coordination polymers constructed from acylhydrazidate molecules: synthesis and structural characterization
Source: Royal Society of Chemistry journal article supplement (doi:10.1039/c4dt01877j), 2014-01-01
Supplement: c4dt01877j1.pdf [file c4dt01877j1.pdf]

## Supporting materials

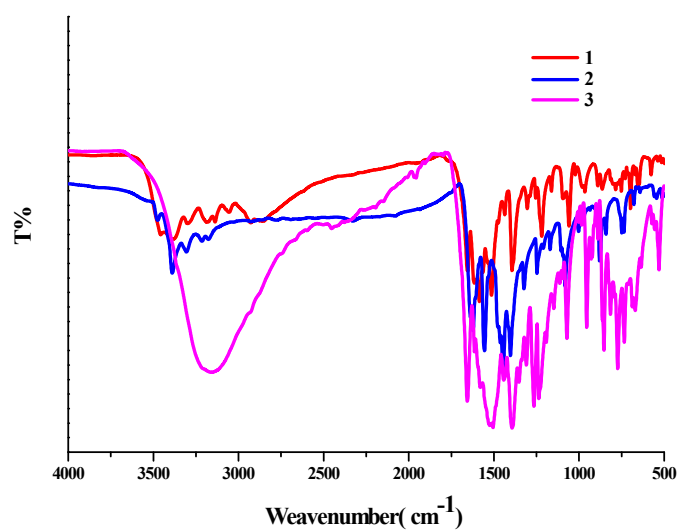

Fig. S1 IR spectra of 1-3.

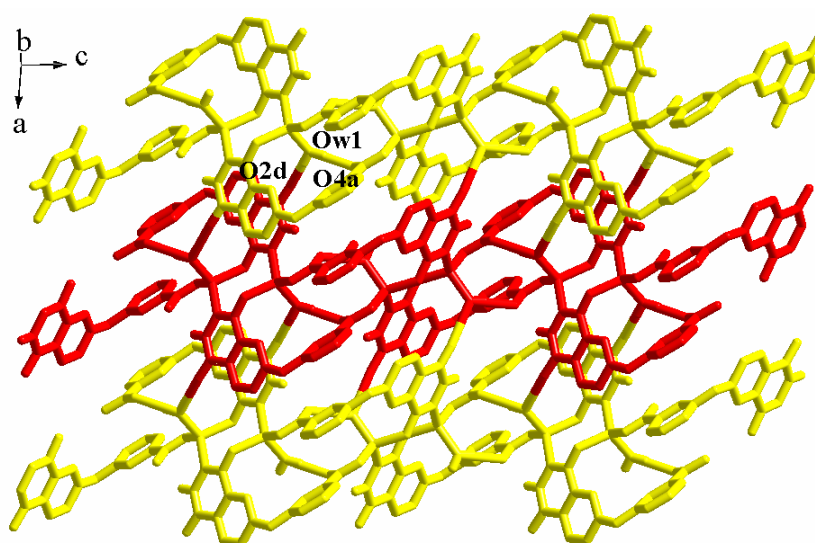

Fig. S2 A plot showing hydrogen-bonded interactions between chains in **3**.

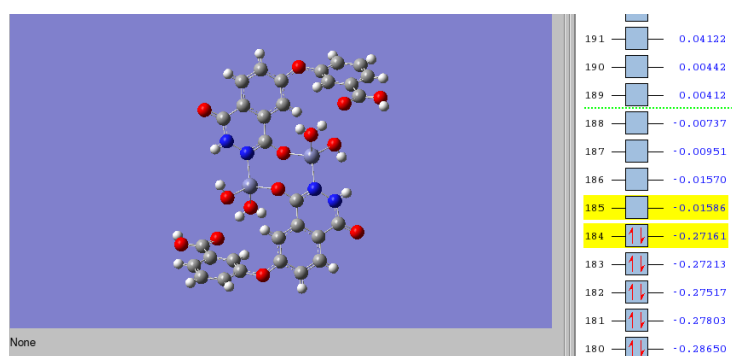

**Fig. S3** First singlet excited state structure of **3**.

Computational details for DFT calculations for compound **3**

The ground state geometry of the isolated molecule has been fully optimized by Gaussian 09 program package <sup>1</sup> with the long-range corrected functional CAM-B3LYP.<sup>2</sup> In terms of basis sets, the double- $\zeta$  quality 6-31G\* and LanL2TZ basis set <sup>3</sup> associated with the pseudopotential were respectively employed for the lighter nonmetallic atoms in ligands (such as N, O, C, H, atoms) and the Zn atom.

#### References

- 1 G. W. T. M. J. Frisch, H. B. Schlegel, G. E. Scuseria, M. A. Robb, J. R. Cheeseman, G. Scalmani, V. Barone, B. Mennucci, G. A. Petersson, H. Nakatsuji, M. Caricato, X. Li, H. P. Hratchian, A. F. Izmaylov, J. Bloino, G. Zheng, J. L. Sonnenberg, M. Hada, M. Ehara, K. Toyota, R. Fukuda, J. Hasegawa, M. Ishida, T. Nakajima, Y. Honda, O. Kitao, H. Nakai, T. Vreven, J. A. Montgomery, Jr., J. E. Peralta, F. Ogliaro, M. Bearpark, J. J. Heyd, E. Brothers, K. N. Kudin, V. N. Staroverov, R. Kobayashi, J. Normand, K. Raghavachari, A. Rendell, J. C. Burant, S. S. Iyengar, J. Tomasi, M. Cossi, N. Rega, J. M. Millam, M. Klene, J. E. Knox, J. B. Cross, V. Bakken, C. Adamo, J. Jaramillo, R. Gomperts, R. E. Stratmann, O. Yazyev, A. J. Austin, R. Cammi, C. Pomelli, J. W. Ochterski, R. L. Martin, K. Morokuma, V. G. Zakrzewski, G. A. Voth, P. Salvador, J. J. Dannenberg, S. Dapprich, A. D. Daniels, O. Farkas, J. B. Foresman, J. V. Ortiz, J. Cioslowski, and D. J. Fox, *Gaussian 09, Revision D.01*, Gaussian, Inc, Wallingford CT, 2009.
- 2 T. Yanai, D. P. Tew and N. C. Handy, *Chemical Physics Letters*, 2004, **393**, 51-57.
- 3 (a) P. J. Hay and W. R. Wadt, *J. Chem. Phys.*, 1985, **82**, 270; (b) P. J. Hay and W. R. Wadt, *J. Chem. Phys.*, 1985, **82**, 284 ; (c) P. J. Hay and W. R. Wadt, *J. Chem. Phys.*, 1985, **82**, 299.
